# Supplementary material for: Replacing amine by azide: dopamine azide polymerization triggered by sodium periodate
Source: Royal Society of Chemistry journal article supplement (doi:10.1039/d2py00293k), 2022-01-01
Supplement: d2py00293k1.pdf [file d2py00293k1.pdf]

## Supporting Information

### Replacing amine by azide: Dopamine azide polymerization triggered by sodium periodate

Monika Szukowska<sup>1,2</sup>, Łukasz Popena<sup>3</sup>, Emerson Coy<sup>3</sup>, Claudiu Filip<sup>4</sup>, Jakub Grajewski<sup>1</sup>,  
Matusz Kempniński<sup>5</sup>, Yeonho Kim<sup>6</sup>, Radosław Mrówczyński<sup>1,2\*</sup>

<sup>1</sup> Faculty of Chemistry, Adam Mickiewicz University, ul. Uniwersytetu Poznańskiego 8, 61-614 Poznań, Poland

<sup>2</sup> Center for Advanced Technologies, ul. Uniwersytetu Poznańskiego 10, 61-614 Poznań, Poland

<sup>3</sup> NanoBioMedical Centre, Adam Mickiewicz University, ul. Wszechnicy Piastowskiej 3, 61-614, Poznań, Poland

<sup>4</sup> National Institute for R&D of Isotopic and Molecular Technologies, 400293 Cluj, Romania

<sup>5</sup> Faculty of Physics, Adam Mickiewicz University, ul. Uniwersytetu Poznańskiego 2, 61-614 Poznań, Poland

<sup>6</sup> Department of Applied Chemistry, Konkuk University, Chungju 27478, Republic of Korea

Correspondence to : [radoslaw.mrowczynski@amu.edu.pl](mailto:radoslaw.mrowczynski@amu.edu.pl)

**Keywords: azide, catechol, polydopamine, polycatechols, polymerization,**

## Table of contents

|                                                                                                                                                                                                                                                                                                                                                                                                                                                       |    |
|-------------------------------------------------------------------------------------------------------------------------------------------------------------------------------------------------------------------------------------------------------------------------------------------------------------------------------------------------------------------------------------------------------------------------------------------------------|----|
| Synthesis of 4-(2-azidoethyl)benzene-1,2-diol.....                                                                                                                                                                                                                                                                                                                                                                                                    | 3  |
| Figure S1. Zeta Potential of poly(dopaazide) particles in H <sub>2</sub> O.....                                                                                                                                                                                                                                                                                                                                                                       | 4  |
| Figure S2. Thermal properties of poly(dopaazide) recoded by means of STA.....                                                                                                                                                                                                                                                                                                                                                                         | 4  |
| Figure S3 <sup>1</sup> H- <sup>1</sup> H COSY spectrum of dopamine-azide (DMSO- <i>d</i> <sub>6</sub> , 298 K).....                                                                                                                                                                                                                                                                                                                                   | 5  |
| Figure S4 <sup>1</sup> H- <sup>13</sup> C HSQC spectrum of dopamine-azide (DMSO- <i>d</i> <sub>6</sub> , 298 K) .....                                                                                                                                                                                                                                                                                                                                 | 5  |
| Figure S5 <sup>1</sup> H- <sup>13</sup> C HMBC spectrum of dopamine-azide (DMSO- <i>d</i> <sub>6</sub> , 298 K) .....                                                                                                                                                                                                                                                                                                                                 | 6  |
| Figure S6. Experiment with different equivalents of NaIO <sub>4</sub> . The left row corresponds to poly(dopaazide) and the right row presents PDA. Flask number: 1 and 10 (0.1 eq. NaIO <sub>4</sub> ), 2 and 9 (0.2 eq. NaIO <sub>4</sub> ), 3 and 8 (0.5 eq. NaIO <sub>4</sub> ), 4 and 6 (1.0 eq. NaIO <sub>4</sub> ), 5 and 6 (2.0 eq. NaIO <sub>4</sub> ).....                                                                                  | 7  |
| Figure S7. SEM pictures of poly(dopaazide) and PDA particles formed after 24 hours of polymerization with different equivalents of NaIO <sub>4</sub> . The upper row corresponds to poly(dopaazide) and the bottom row presents PDA. Flask number: 1 and 10 (0.1 eq. NaIO <sub>4</sub> ), 2 and 9 (0.2 eq. NaIO <sub>4</sub> ), 3 and 8 (0.5 eq. NaIO <sub>4</sub> ), 4 and 6 (1.0 eq. NaIO <sub>4</sub> ), 5 and 6 (2.0 eq. NaIO <sub>4</sub> )..... | 8  |
| Table S1 Contact angle (CA) measurement results for poly(dopaazide) and polydopamine (PDA).....                                                                                                                                                                                                                                                                                                                                                       | 8  |
| Figure S8. AFM pictures of coated substrates by poly(dopaazide) and PDA. A. poly(dopaazide)/glass 24 h, B. poly(dopaazide)/glass 48 h, C. poly(dopaazide)/Si 48 h, D. PDA/glass 24 h, E. PDA/glass 48 h, F. PDA/Si 48 h .....                                                                                                                                                                                                                         | 9  |
| Table S2 Proposed structures of poly(dopaazide) predicted from mass spectrometry analysis.....                                                                                                                                                                                                                                                                                                                                                        | 9  |
| <b>References</b> .....                                                                                                                                                                                                                                                                                                                                                                                                                               | 21 |

## Synthesis of 4-(2-azidoethyl)benzene-1,2-diol

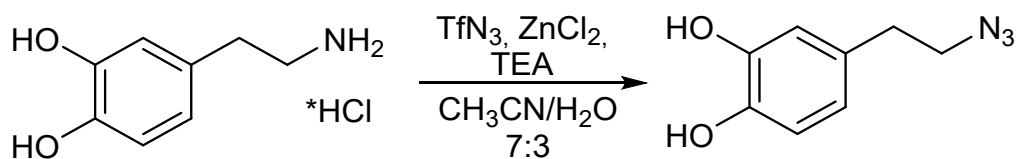

The compound was synthesized according to the procedure presented by Pagoti et al.<sup>1</sup> The trifluoromethanesulfonylazide (TfN<sub>3</sub>) was prepared by addition trifluoromethanesulfonic anhydride (Tf<sub>2</sub>O) (1.06 mL, 6.32 mmol, 1.2 eq.) to the suspension of sodium azide (1.0 g, 15.38 mmol, 2.0 eq) in 15 mL of CH<sub>3</sub>CN in ice bath. The reaction temperature was maintained at 0 °C for 2 hours. Next dopamine hydrochloride (DA·HCl) (1.0 g (5.27 mmol, 1.0 eq.) was dissolved 25 mL of H<sub>2</sub>O:CH<sub>3</sub>CN (3:7) mixture under argon atmosphere followed by addition freshly prepared trifluoromethanesulfonyl azide (TfN<sub>3</sub>), zinc chloride (ZnCl<sub>2</sub>) (71.8 mg ,0.53 mmol, 0.1 eq.) and 2.21 mL (15.87 mmol, 3.0 eq.) of triethylamine (TEA). After 24 h, the crude mixture was filtered and concentrated on the rotary evaporator followed by extraction with ethyl acetate. The organic layer were dried over magnesium sulfate and evaporated to dryness. The product was purified by column chromatography using ethyl acetate:hexane 3:7 as eluent phase yielding 850 mg (79 %) of 4-(2-azidoethyl)benzene-1,2-diol as slightly darkish solid.

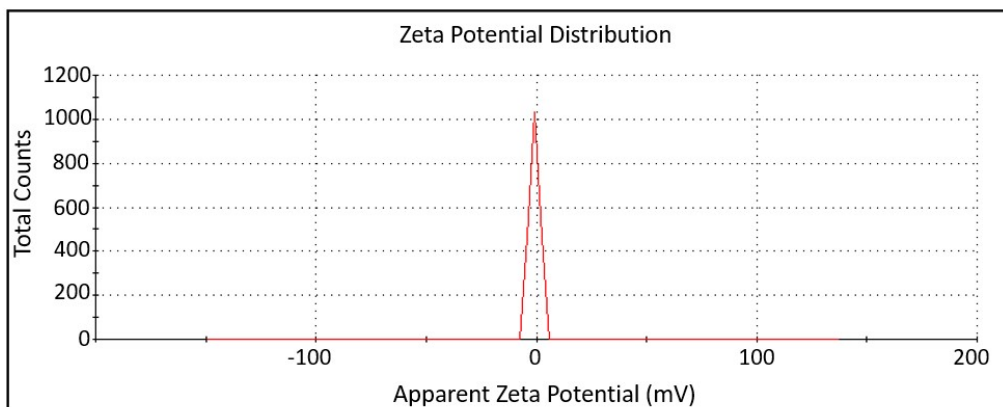

Figure S1. Zeta Potential of poly(dopaazide) particles in H<sub>2</sub>O

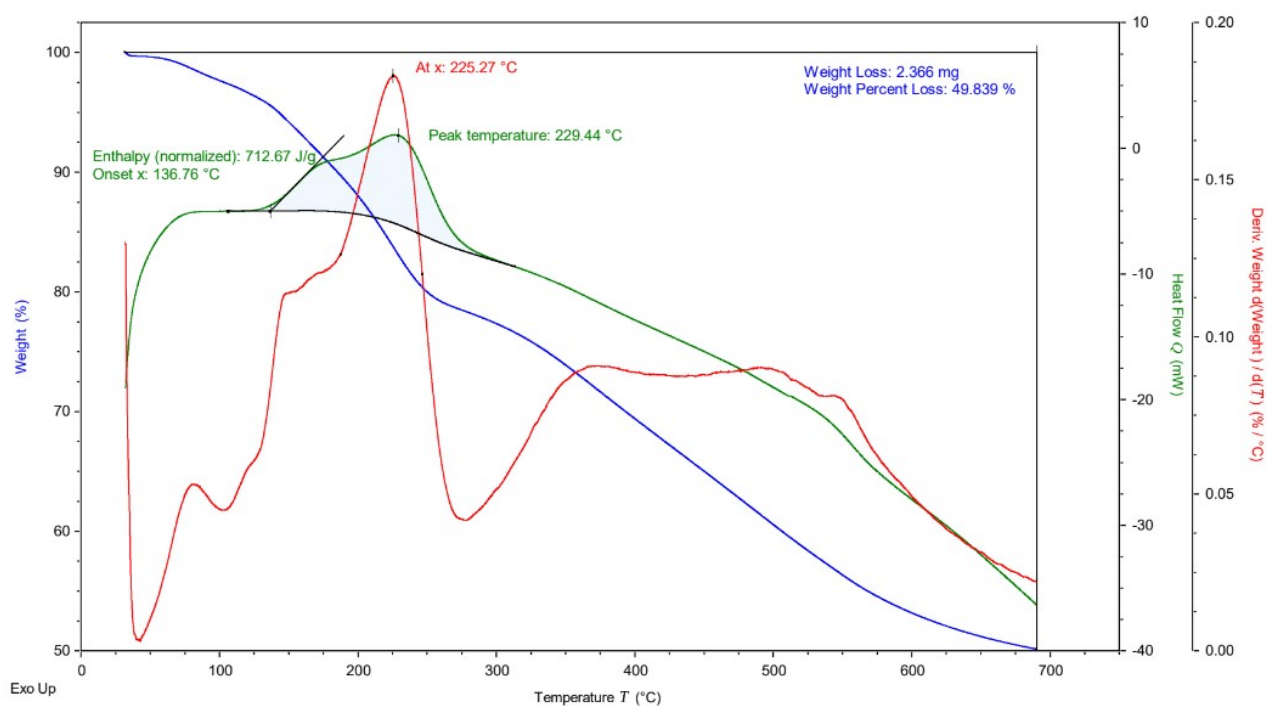

Figure S2. Thermal properties of poly(dopaazide) recorded by means of STA

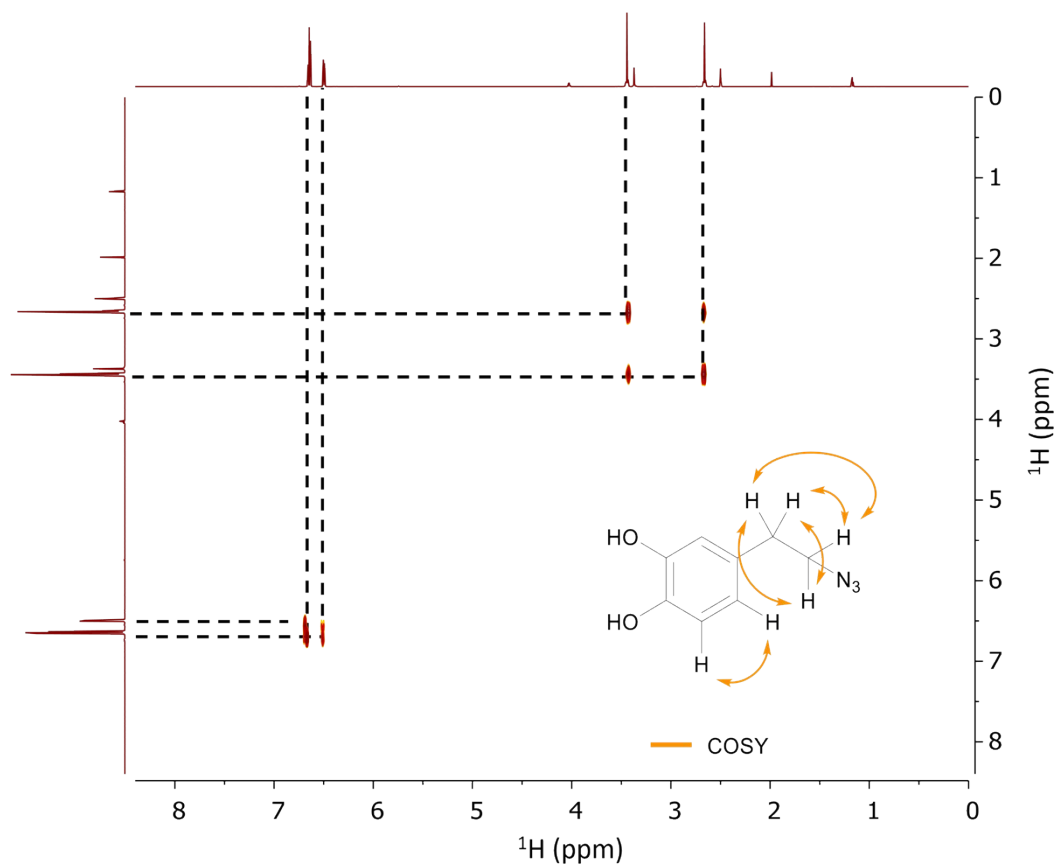

Figure S3.  $^1\text{H}$ - $^1\text{H}$  COSY spectrum of dopamine-azide (DMSO- $d_6$ , 298 K).

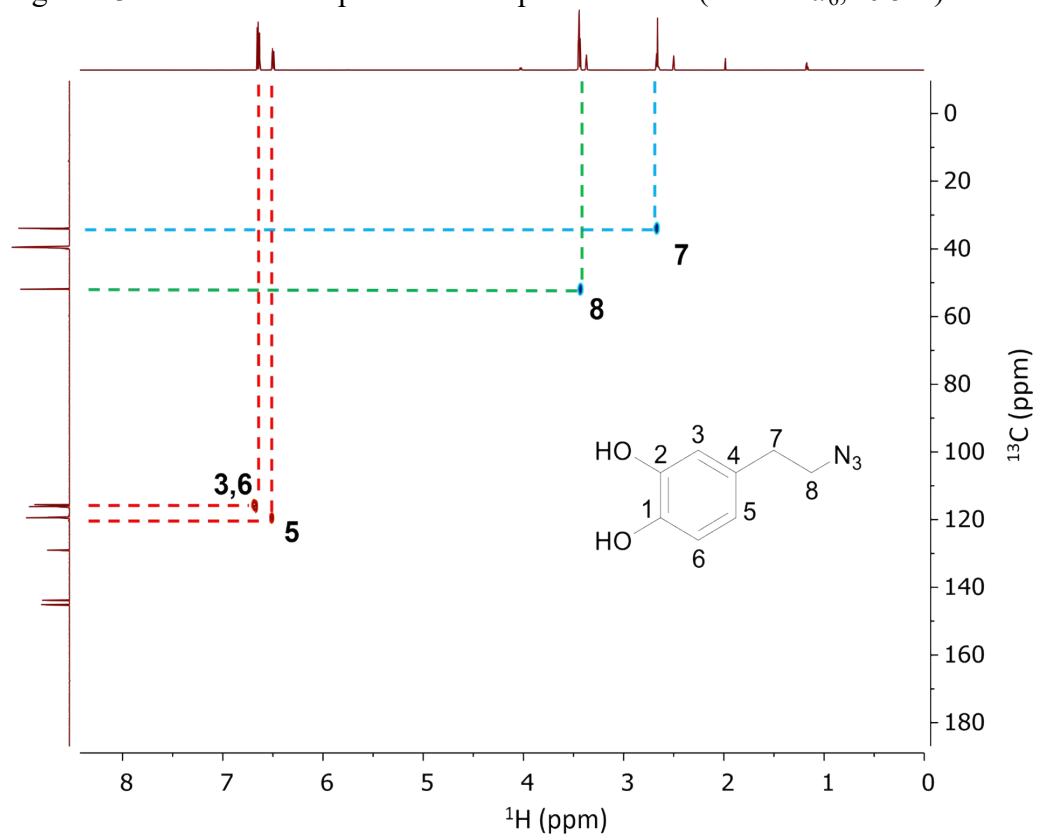

Figure S4.  $^1\text{H}$ - $^{13}\text{C}$  HSQC spectrum of dopamine-azide (DMSO- $d_6$ , 298 K).

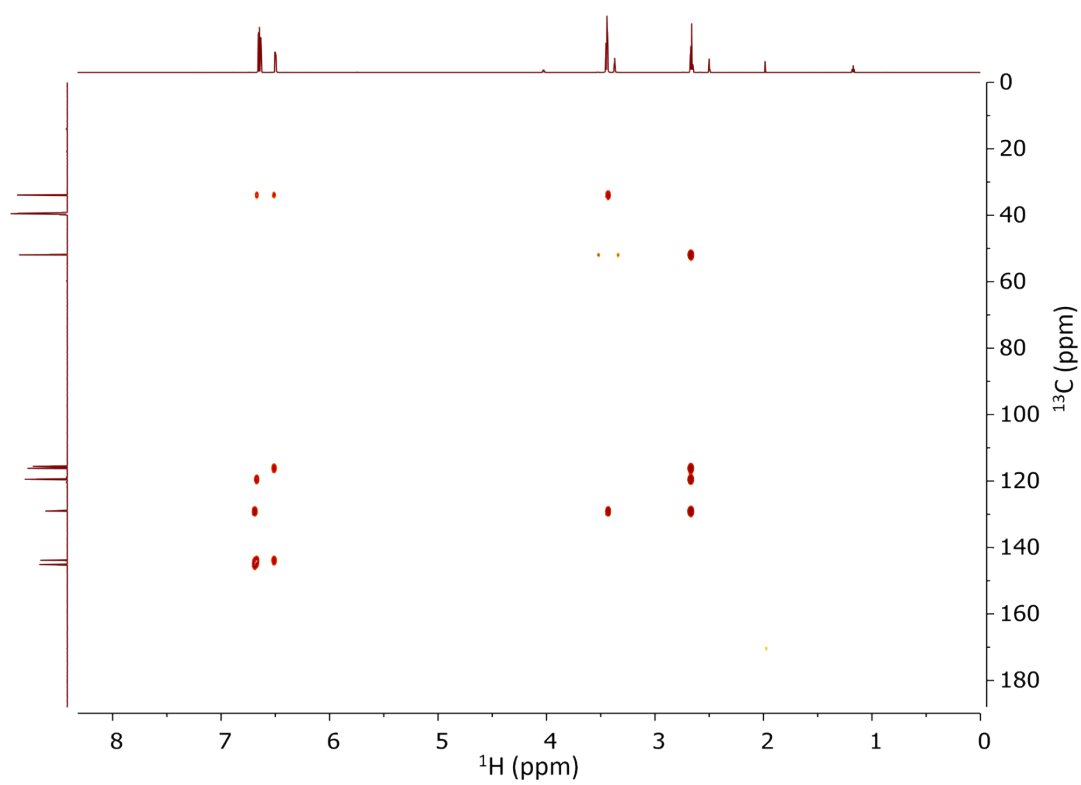

Figure S5.  $^1\text{H}$ - $^{13}\text{C}$  HMBC spectrum of dopamine-azide ( $\text{DMSO-}d_6$ , 298 K)

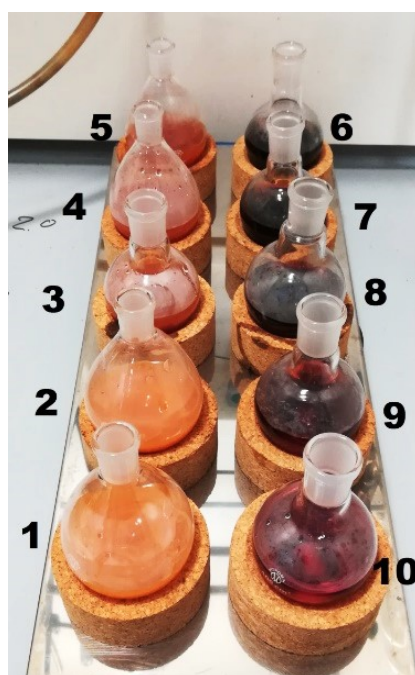

Figure S6. Experiment with different equivalents of  $\text{NaIO}_4$ . The left row corresponds to poly(dopaazide) and the right row presents PDA. Flask number: 1 and 10 (0.1 eq.  $\text{NaIO}_4$ ), 2 and 9 (0.2 eq.  $\text{NaIO}_4$ ), 3 and 8 (0.5 eq.  $\text{NaIO}_4$ ), 4 and 6 (1.0 eq.  $\text{NaIO}_4$ ), 5 and 6 (2.0 eq.  $\text{NaIO}_4$ )

After adding the periodate solution in water to the dopamine azide solution, an instantaneous color change from transparent to intense, clear orange was observed. Over time, the mixture turned cloudy, and the color became slightly lighter, dirty-orange. It was noticed that with more periodate added, the color of the mixture was darker and more brown than orange what suggest increased transformation speed of the intermediates. In the case of dopamine, the solution turned red immediately after adding the oxidant, gradually turning into cherry red, and finally turning a maroon color. As the concentration of periodate increased in the flask, the effect was the same as for the azide analog, i.e. a darker color was observed. The experiment was carried out for 24 h with oxygen access. The samples were purified by centrifugation and washed with water until the supernatant was transparent.

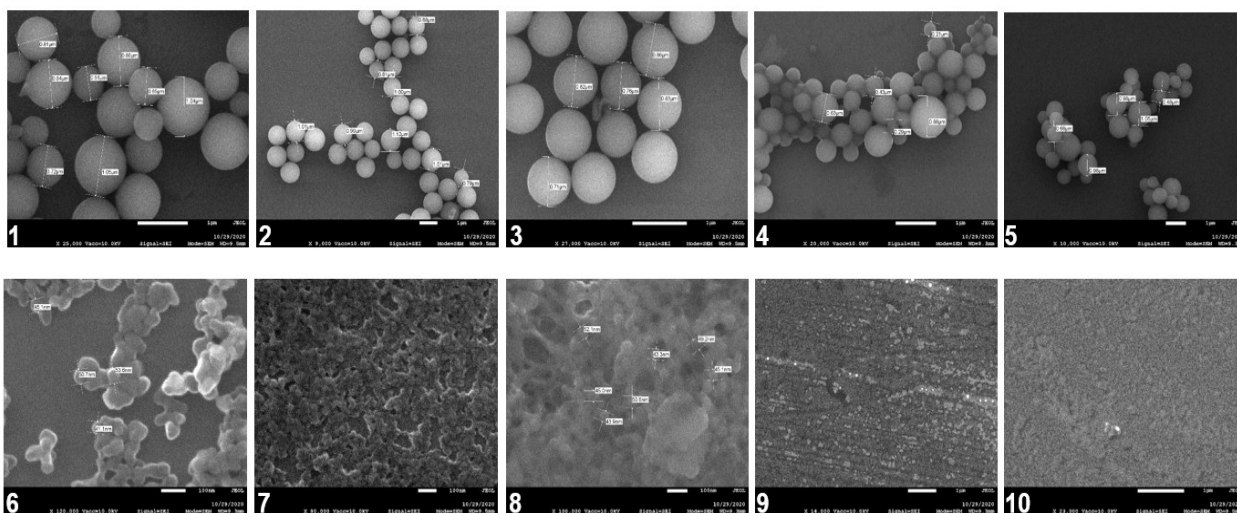

Figure S7. SEM pictures of poly(dopaazide) and PDA particles formed after 24 hours of polymerization with different equivalents of  $\text{NaIO}_4$ . The upper row corresponds to poly(dopaazide) and the bottom row presents PDA. Flask number: 1 and 10 (0.1 eq.  $\text{NaIO}_4$ ), 2 and 9 (0.2 eq.  $\text{NaIO}_4$ ), 3 and 8 (0.5 eq.  $\text{NaIO}_4$ ), 4 and 6 (1.0 eq.  $\text{NaIO}_4$ ), 5 and 6 (2.0 eq.  $\text{NaIO}_4$ )

Table S1 Contact angle (CA) measurement results for poly(dopaazide) and polydopamine (PDA)

| Sample                     | Initial CA | After 1 min | After 10 min |
|----------------------------|------------|-------------|--------------|
| Poly(dopaazide)/glass 24 h | 62         | 58          | 36           |
| Poly(dopaazide)/glass 48 h | 70         | 67          | 47           |
| Poly(dopaazide)/Si 48 h    | 77         | 53          | 32           |
| PDA/glass 24 h             | 51         | 50          | 39           |
| PDA/glass 48 h             | 62         | 60          | 38           |
| PDA/Si 48 h                | 65         | 61          | 53           |



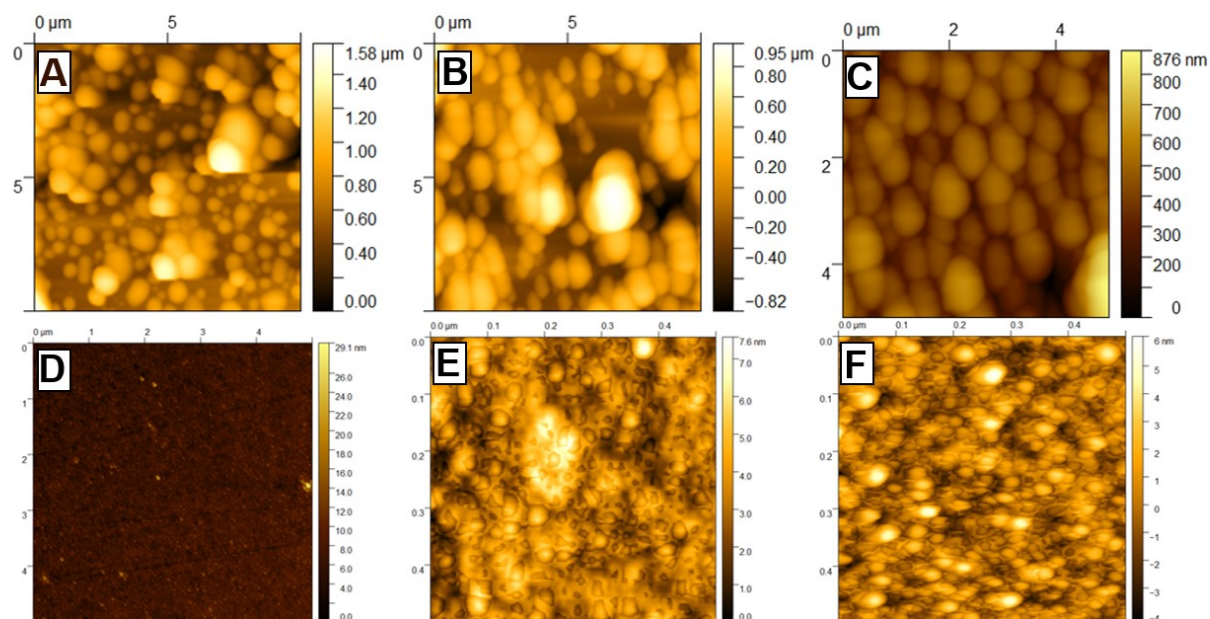

Figure S8. AFM pictures of coated substrates by poly(dopaazide) and PDA. A. poly(dopaazide)/glass 24 h, B. poly(dopaazide)/glass 48 h, C. poly(dopaazide)/Si 48 h, D. PDA/glass 24 h, E. PDA/glass 48 h, F. PDA/Si 48 h

Table S2 Proposed structures of poly(dopaazide) predicted from mass spectrometry analysis

| Mass predicted from ESI-MS in positive ion mode | Mass found           | Structure                                                                                             |
|-------------------------------------------------|----------------------|-------------------------------------------------------------------------------------------------------|
| 353.2670                                        | 353.9581<br>353.1227 | <p>Exact Mass: 353.9581</p> <p>or</p> <p>+ Na</p> <p>Exact Mass: 330.1328<br/>Exact Mass: 22.9892</p> |

|                                                           |                   |                                                                                                                                         |
|-----------------------------------------------------------|-------------------|-----------------------------------------------------------------------------------------------------------------------------------------|
| 456.1425                                                  | 456.2129          | 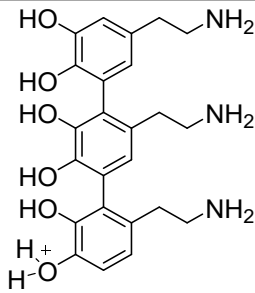 <p>Exact Mass: 456.2129</p>                         |
| 550.2056                                                  | 550.1194          |  <p>Exact Mass: 527.1302<br/>Exact Mass: 22.9892</p> |
| 711.5766                                                  | 711.2382          |  <p>Exact Mass: 711.2382</p>                        |
| 884.4302                                                  | 884.1123          |  <p>Exact Mass: 884.1123</p>                       |
| <b>Mass predicted from MALDI -MS in positive ion mode</b> | <b>Mass found</b> | <b>Structure</b>                                                                                                                        |

|           |           |                                                                                                                   |
|-----------|-----------|-------------------------------------------------------------------------------------------------------------------|
| 247.2295  | 247.0965  | 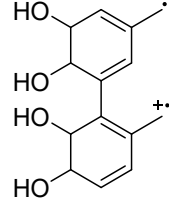 <p>Exact Mass: 247.0965</p>   |
| 488.1690  | 488.1439  |  <p>Exact Mass: 488.1439</p>   |
| 651.2294  | 651.1946  |  <p>Exact Mass: 651.1946</p>   |
| 1656.2420 | 1656.4980 |  <p>Exact Mass: 1656.4969</p> |

|                  |                  |                                                                                                                   |
|------------------|------------------|-------------------------------------------------------------------------------------------------------------------|
| <p>1684.2595</p> | <p>1684.5020</p> | 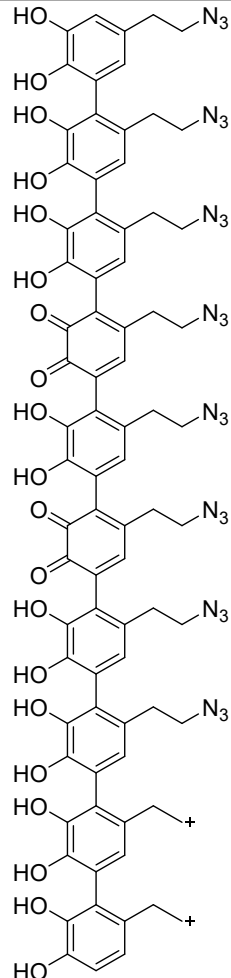 <p>Exact Mass: 1684.5031</p> |
| <p>1926.3296</p> | <p>1926.5872</p> |  <p>Exact Mass: 1926.5872</p> |

|                  |                                |                                                                                                                  |
|------------------|--------------------------------|------------------------------------------------------------------------------------------------------------------|
| <p>2074.3971</p> | <p>2074.1267<br/>2074.6265</p> | 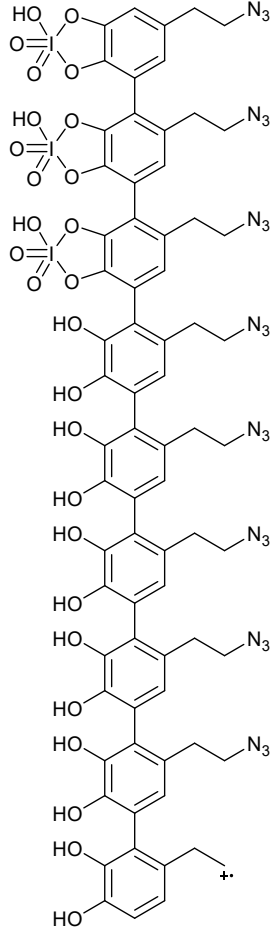 <p>Exact Mass: 2074.1267</p> |
|------------------|--------------------------------|------------------------------------------------------------------------------------------------------------------|

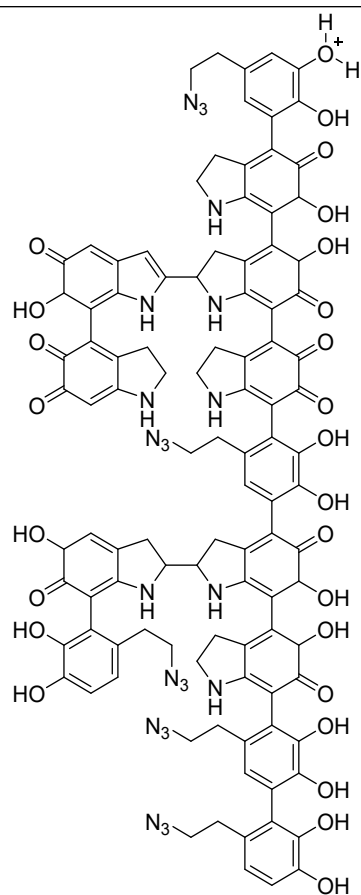

Exact Mass: 2074.6265

|                                                        |                   |                                                                                                                   |
|--------------------------------------------------------|-------------------|-------------------------------------------------------------------------------------------------------------------|
| 2482.5251                                              | 2482.8601         | 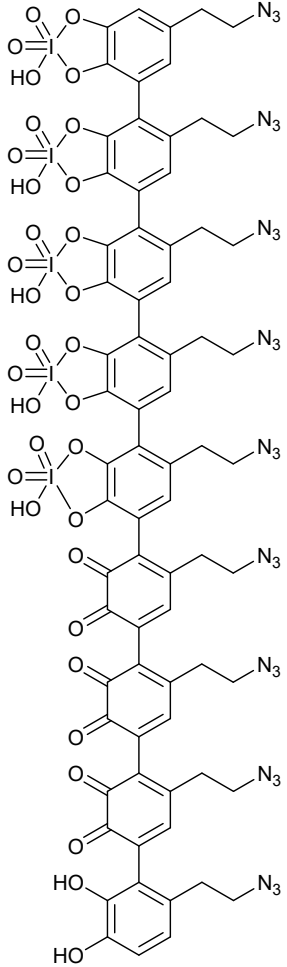 <p>Exact Mass: 2458.8601</p>  |
| <b>Mass predicted from ESI-MS in negative ion mode</b> | <b>Mass found</b> | <b>Structure</b>                                                                                                  |
| 530.1549                                               | 530.1542          |  <p>Exact Mass: 530.1542</p> |

|                                                          |                   |                             |
|----------------------------------------------------------|-------------------|-----------------------------|
| 707.2089                                                 | 707.2080          | <p>Exact Mass: 707.2080</p> |
| <b>Mass predicted from MALDI-MS in negative ion mode</b> | <b>Mass found</b> | <b>Structure</b>            |
| 247.2295                                                 | 247.0965          | <p>Exact Mass: 247.0965</p> |
| 488.1690                                                 | 488.1439          | <p>Exact Mass: 488.1439</p> |
| 651.2294                                                 | 651.1946          | <p>Exact Mass: 651.1946</p> |



|                  |                  |                                                                                                                   |
|------------------|------------------|-------------------------------------------------------------------------------------------------------------------|
| <p>1656.2420</p> | <p>1656.4969</p> | 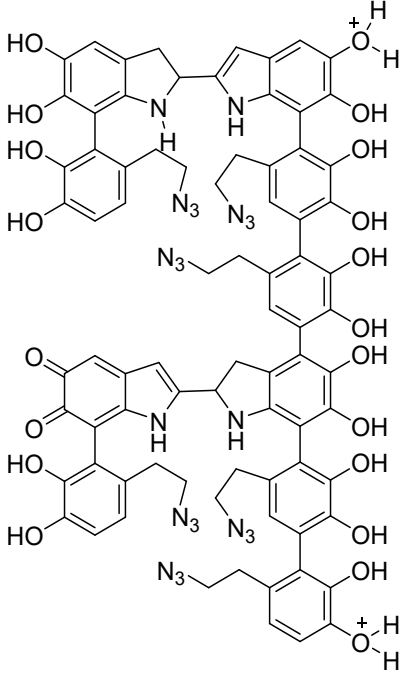 <p>Exact Mass: 1656.4969</p>   |
| <p>1684.2595</p> | <p>1684.5031</p> |  <p>Exact Mass: 1684.5031</p> |

|                  |                                |                                                                                                                   |
|------------------|--------------------------------|-------------------------------------------------------------------------------------------------------------------|
| <p>1926.3296</p> | <p>1926.5861</p>               | 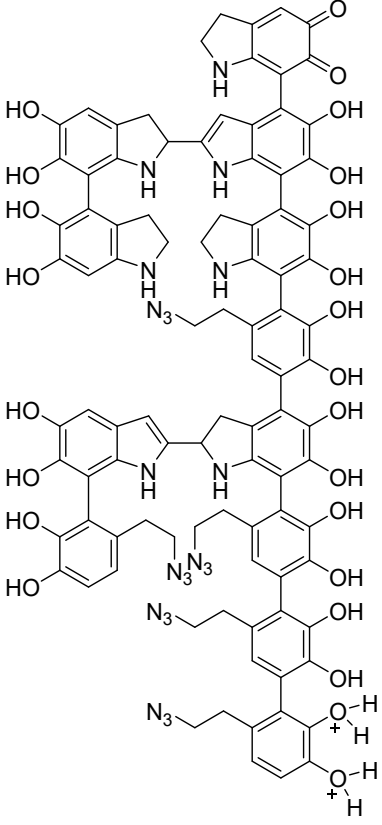 <p>Exact Mass: 1926.5861</p>  |
| <p>2074.3971</p> | <p>2074.1267<br/>2074.6265</p> |  <p>Exact Mass: 2074.1267</p> |

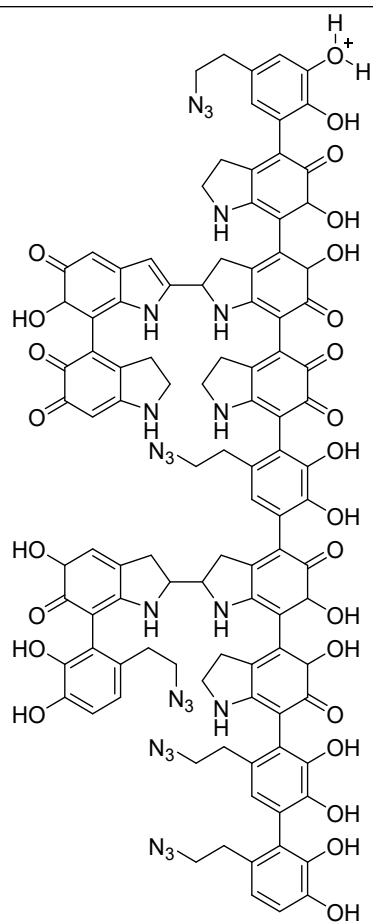

Exact Mass: 2074.6265

## References

1. Pagoti, S., Dutta, D. & Dash, J. A magnetoclick imidazolidinone nanocatalyst for asymmetric 1,3-dipolar cycloadditions. *Adv. Synth. Catal.* **355**, 3532–3538 (2013).
